# Supplementary material for: Direct observation of the CVD growth of monolayer MoS2 using in situ optical spectroscopy
Source: publisher site journal article supplement (doi:10.3762/bjnano.10.57), 2019-02-26
Supplement: Additional file 1 [file 2190-4286-10-57-S1.pdf]

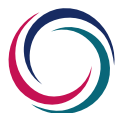

## Supporting Information

for

### **Direct observation of the CVD growth of monolayer MoS<sub>2</sub> using in situ optical spectroscopy**

Claudia Beatriz López-Posadas, Yaxu Wei, Wanfu Shen, Daniel Kahr, Michael Hohage and Lidong Sun

*Beilstein J. Nanotechnol.* **2019**, *10*, 557–564. doi:10.3762/bjnano.10.57

## Additional experimental data

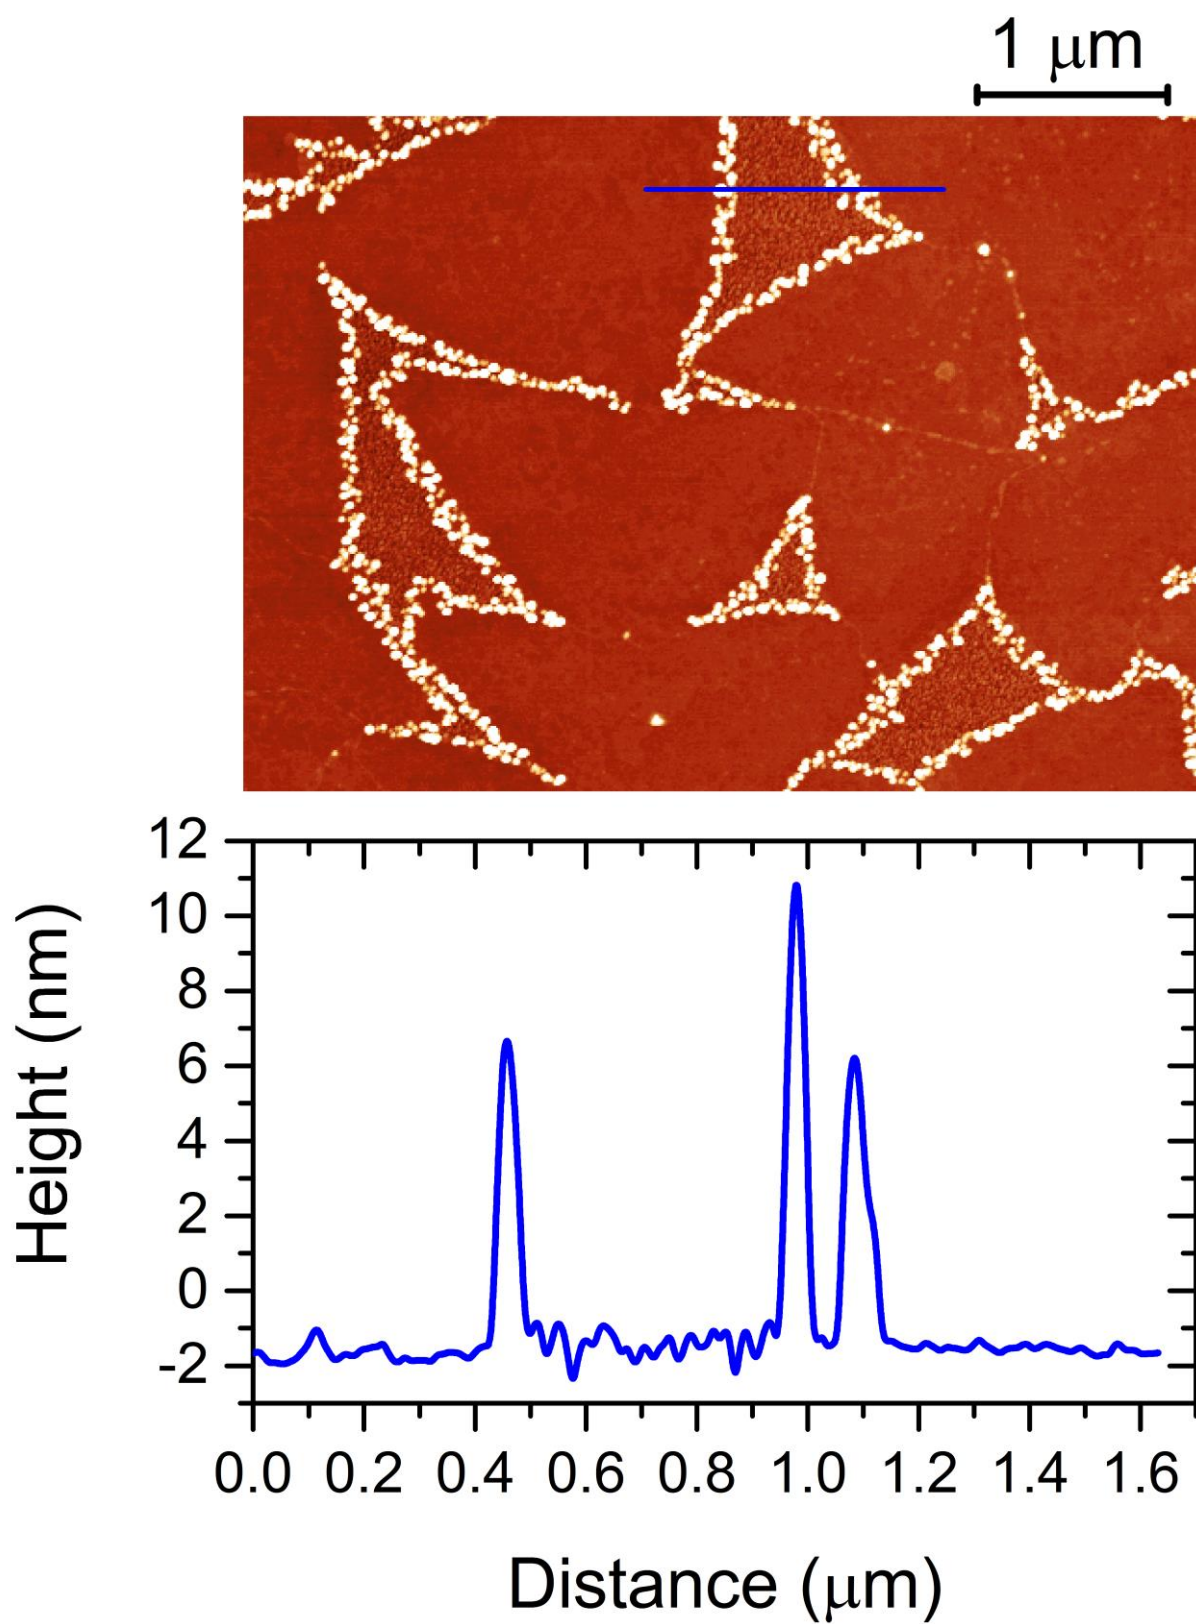

**Figure S1:** AFM image with a height profile measured from the front surface of the substrate.
